# Supplementary material
Source: publisher site journal article supplement (http://kjim.org/upload/media/kjim-2020-135-suppl4.pdf)
Supplement: Supplementary file 1 [file kjim-2020-135-suppl4.pdf]

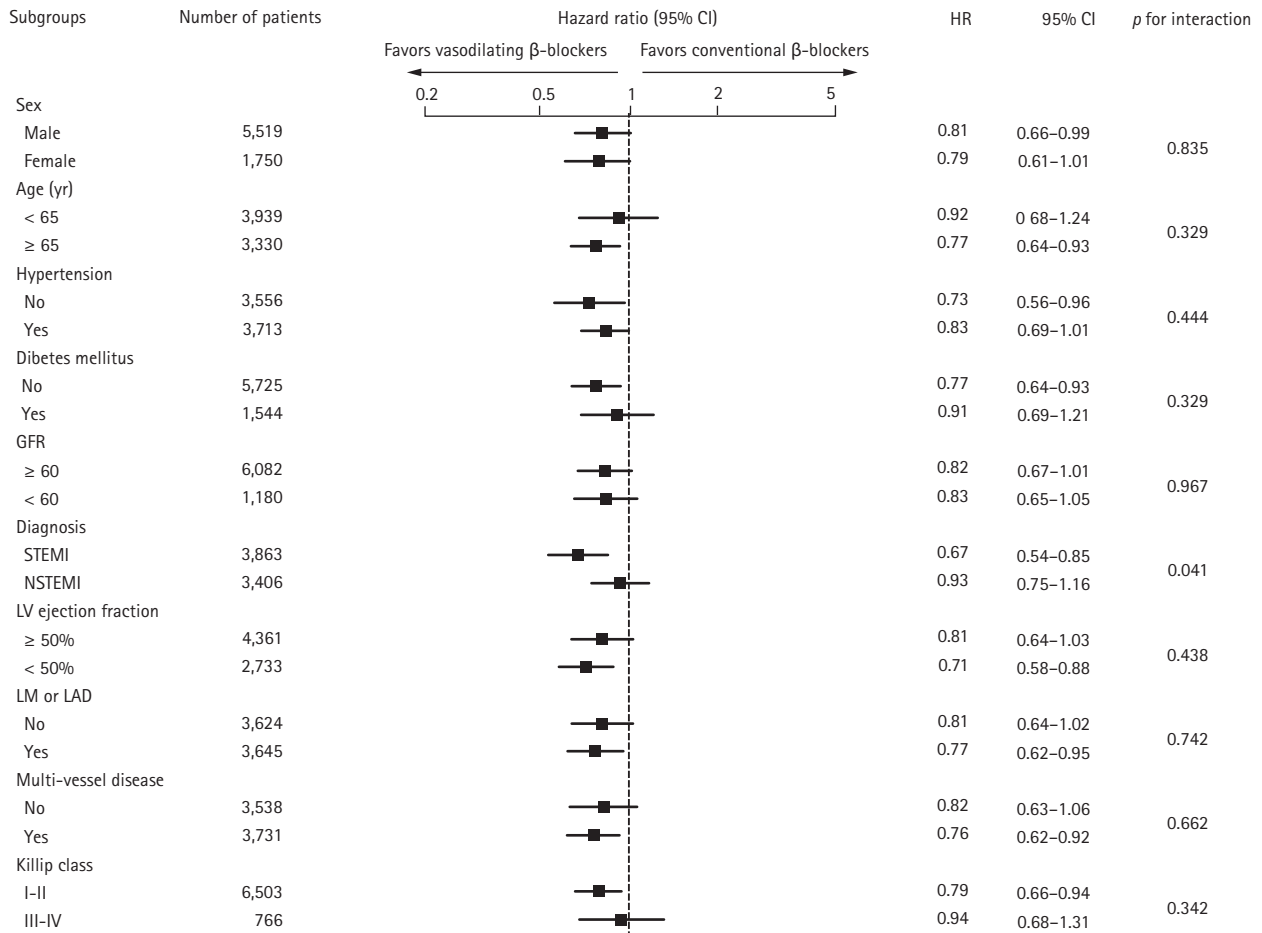

**Supplementary Figure 2.** Comparative unadjusted hazard ratios (HRs) of composite cardiac events for subgroups in the whole study population using vasodilating  $\beta$ -blockers and conventional  $\beta$ -blockers. CI, confidence interval; GFR, glomerular filtration rate (mg/dL); STEMI, ST segment elevation myocardial infarction; NSTEMI, non-ST segment elevation myocardial infarction; LV, left ventricle; LM, left main; LAD, left anterior descending artery.
